# Supplementary material for: Three-dimensionally ordered macro–mesoporous CoMo bulk catalysts with superior performance in hydrodesulfurization of thiophene
Source: Royal Society of Chemistry journal article supplement (doi:10.1039/d0ra07153f), 2020-01-01
Supplement: d0ra07153f1.pdf [file d0ra07153f1.pdf]

## Supporting information

### Three-dimensionally ordered macro-mesoporous CoMo bulk catalysts with superior performance in hydrodesulfurization of thiophene

Guoliang Chen<sup>a,b</sup>, Wenpeng Xie<sup>a</sup>, Qinghong Li<sup>a</sup>, Wentai Wang<sup>c</sup>, Liancheng Bing<sup>a</sup>, Fang Wang<sup>a</sup>, Guangjian Wang<sup>a</sup>, Chunyan Fan<sup>b</sup>, Shaomin Liu<sup>b</sup>, Dezhi Han<sup>a,\*</sup>

<sup>a</sup> State Key Laboratory Base of Eco-chemical Engineering, College of Chemical Engineering, Qingdao University of Science and Technology, Qingdao 266042, China

<sup>b</sup> WA School of Mines: Minerals, Energy and Chemical Engineering, Curtin University, GPO Box U1987, Perth, WA 6845, Australia

<sup>c</sup> Key Laboratory of Marine Chemistry Theory and Technology, Ministry of Education, College of Chemistry and Chemical Engineering, Ocean University of China, Qingdao 266100, China

\*Corresponding author: D. Han (handzh@qust.edu.cn)

### Chemicals and materials

Cobalt(II) nitrate hexahydrate ( $(\text{Co}(\text{NO}_3)_2 \cdot 6\text{H}_2\text{O})$ , 98%), Hexaammonium heptamolybdate tetrahydrate ( $(\text{NH}_4)_6\text{MO}_7\text{O}_{24} \cdot 4\text{H}_2\text{O}$ , 99%), Polyethylene glycol 400 ( $(\text{H}(\text{OCH}_2\text{CH}_2)_n\text{OH})$ , 99% donated PEG 400), Cyclohexane ( $(\text{C}_6\text{H}_{12})$ , 99%), Octane ( $(\text{C}_8\text{H}_{18})$ , 98%), Carbon disulfide ( $(\text{CS}_2)$ , 99%), Ethanol pure ( $(\text{C}_2\text{H}_6\text{O})$ , 99%) were purchased from sinopharm chemical reagent (Shanghai, China). The thiophene ( $(\text{C}_4\text{H}_4\text{S})$ , 98%) was obtained from Fluka (Buchs, Switzerland) and the Pluronic<sup>®</sup> F-127 ( $(\text{C}_3\text{H}_6\text{O} \cdot \text{C}_2\text{H}_4\text{O})_x$ , donated F 127) was purchased from Sigma (St. Louis, MO, USA). These reagents were used as received without any further purification.

### The analysis of TG and DTG

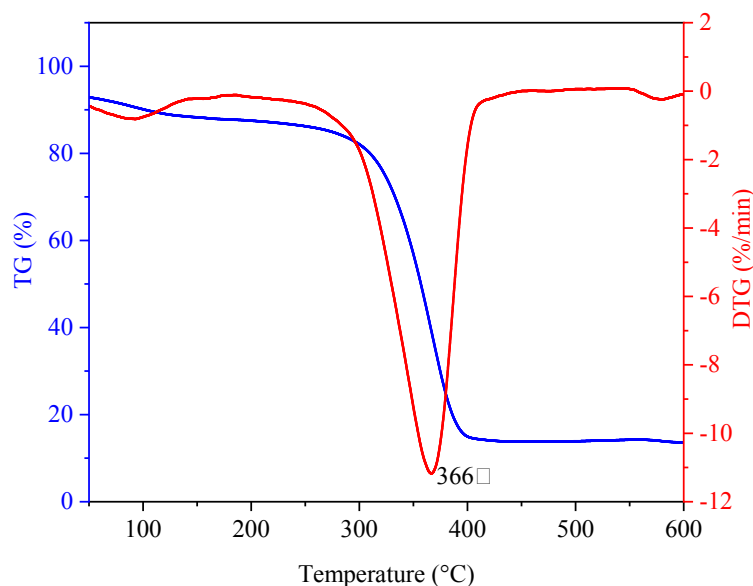

**Figure S1** The TG and DTG curves of catalyst precursor/CCT intermediate composite.

### The calculation of MoS<sub>2</sub> dispersion

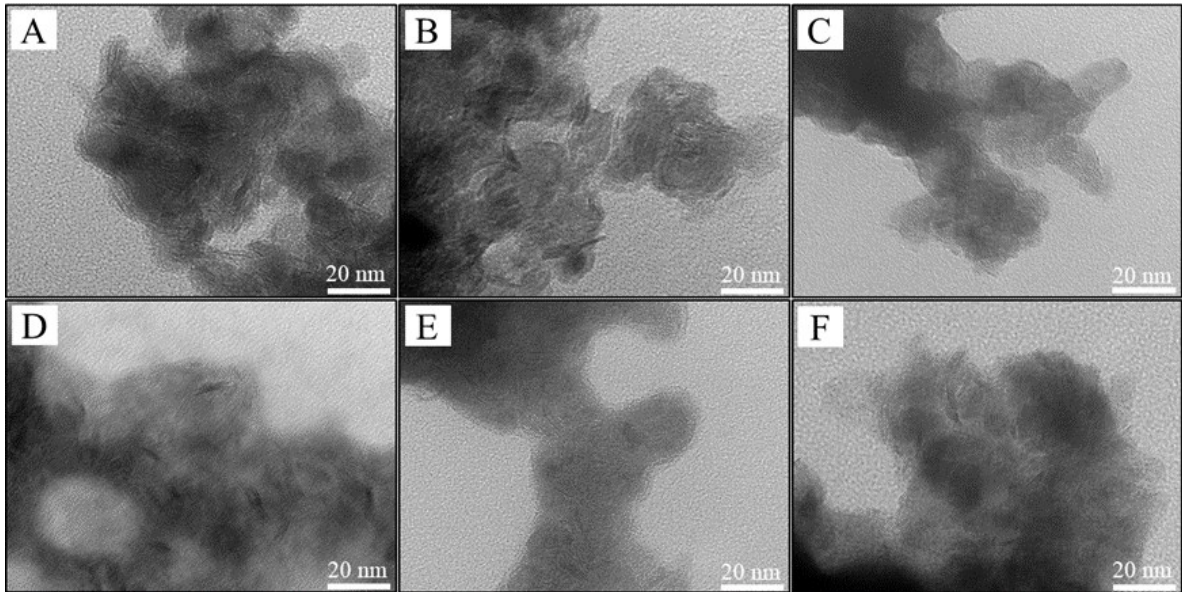

**Figure S2** The HRTEM images of the prepared CoMo bulk catalysts with three-dimensionally ordered macroporous structure

(A: CoMo; B: CoMo-PEG; C: CoMo-F127; D: CoMo-PF-1; E: CoMo-PF-2; F: CoMo-PF-3)

According to the literature<sup>1,2</sup>, the average length ( $\bar{L}$ ), the dispersion of MoS<sub>2</sub> (D), and the average stacking number ( $\bar{N}$ ) of MoS<sub>2</sub> slabs are expressed by the following equation:

$$\bar{L} = \frac{\sum_{i=1}^n x_i M_i}{\sum_{i=1}^n x_i} \quad (\text{E-1})$$

$$\bar{N} = \frac{\sum_{i=1}^n x_i N_i}{\sum_{i=1}^n x_i} \quad (\text{E-3})$$

$$D = \frac{\sum_{i=1...t} 6n_i - 6}{\sum_{i=1...t} 3n_i^2 - 3n_i + 1} \quad (\text{E-2})$$

Where  $x_i$  is the number of MoS<sub>2</sub> slabs possessing  $L_i$  length or  $N_i$  number of layers and  $M_i$  is the length or layer number of MoS<sub>2</sub> slabs in each stack. Where  $n_i$  is the number of Mo atoms along one side of the MoS<sub>2</sub> slab determined from its length and  $t$  is the total number of slabs in the TEM micrographs.

**Table S1** MoS<sub>2</sub> dispersion calculated from TEM micrographs

| Catalyst  | Slabs of MoS <sub>2</sub> per 1000nm <sup>2</sup> | Average length $\bar{L}$ (nm) | Average stacking number $\bar{N}$ | Dispersion of MoS <sub>2</sub> D |
|-----------|---------------------------------------------------|-------------------------------|-----------------------------------|----------------------------------|
| CoMo      | 40                                                | 7.8                           | 4.4                               | 0.16                             |
| CoM-PEG   | 32                                                | 7.0                           | 4.0                               | 0.17                             |
| CoMo-F127 | 31                                                | 5.8                           | 3.9                               | 0.21                             |
| CoMo-PF-1 | 30                                                | 5.0                           | 3.3                               | 0.24                             |
| CoMo-PF-2 | 33                                                | 6.0                           | 3.7                               | 0.20                             |
| CoMo-PF-3 | 35                                                | 7.2                           | 3.9                               | 0.17                             |

**Table S2** Comparative study of thiophene conversion available in the literatures for HDS catalysts

| Catalyst                                                | Reaction conditions temperature (°C), pressure (bar) | Thiophene conversion | Reference                                                              |
|---------------------------------------------------------|------------------------------------------------------|----------------------|------------------------------------------------------------------------|
| NiMo-3                                                  | 350,1                                                | 90%                  | <i>Energy &amp; Fuels</i> , 2018, 32(2): 2183-2196.                    |
| 5.0-NiSO <sub>4</sub> /γ-Al <sub>2</sub> O <sub>3</sub> | 350,20                                               | 89%                  | <i>Energy &amp; Fuels</i> , 2013, 27(6): 3394-3399.                    |
| CoMo/γ-Al <sub>2</sub> O <sub>3</sub>                   | 270,10                                               | 91.9%                | <i>Applied Catalysis A: General</i> , 2017, 533: 99-108.               |
| Rod-CoMo                                                | 270,10                                               | 95.6%                | <i>Applied Catalysis A: General</i> , 2017, 533: 99-108.               |
| 3DOM CoMo                                               | 360,30                                               | 99.2%                | <i>Fuel Processing Technology</i> , 2020, 199: 106268.                 |
| CoMoNi/ γ-Al <sub>2</sub> O <sub>3</sub> (novel)        | 290,25                                               | 87%                  | <i>Chemical Engineering Journal</i> , 2011, 172(1): 444-451.           |
| CoMoNi/A(N-S)                                           | 330,35                                               | 80%                  | <i>Chinese Journal of Chemical Engineering</i> , 2014, 22(4): 383-391. |
| NiMoW/CNT-PUP500                                        | 160,1                                                | 100%                 | <i>Advanced Powder Technology</i> , 2019, 30(3): 502-512.              |
| S-E                                                     | 300,30                                               | 99.48%               | <i>Catalysis Letters</i> , 2018, 148(5): 1309-1314.                    |

|                     |        |       |                                                    |
|---------------------|--------|-------|----------------------------------------------------|
| NiMo-AP (15 wt% Mo) | 400,1  | 83.4% | <i>RSC advances</i> , 2015, 5(124): 102652-102662. |
| CoMo-PF-1           | 360,10 | 99.4% | This work                                          |

---

## References

- [1] P.A. Nikulshin, V.A. Salnikov, A.V. Mozhaev, et al. Relationship between active phase morphology and catalytic properties of the carbon-alumina-supported Co (Ni) Mo catalysts in HDS and HYD reactions. *Journal of catalysis*, 2014, 309: 386-396.
- [2] M Li, H Li, F Jiang, et al. The relation between morphology of (Co) MoS<sub>2</sub> phases and selective hydrodesulfurization for CoMo catalysts. *Catalysis Today*, 2010, 149: 35-39.
